# Supplementary material for: Plants cultivated for ecosystem restoration can evolve toward a domestication syndrome
Source: PubMed Central journal article supplement — Proc Natl Acad Sci U S A. 2023 May 8;120(20):e2219664120. doi: 10.1073/pnas.2219664120 (PMC10193954; doi:10.1073/pnas.2219664120), 2023-05-08
Supplement: pnas.2219664120.sapp.pdf [file pnas.2219664120.sapp.pdf]

## **Supporting Information for**

## Plants cultivated for ecosystem restoration can evolve towards a domestication syndrome

Malte Conrady, Christian Lampei, Oliver Bossdorf; Norbert Hölzel; Stefan Michalski, Walter Durka, and Anna Bucharova

Corresponding authors Malte Conrady and Anna Bucharova

Email: [malte.conrady@uni-muenster.de](mailto:malte.conrady@uni-muenster.de), [anna.lampe-bucharova@uni-marburg.de](mailto:anna.lampe-bucharova@uni-marburg.de)

### **This PDF file includes:**

Figures S1

Tables S1 to S2

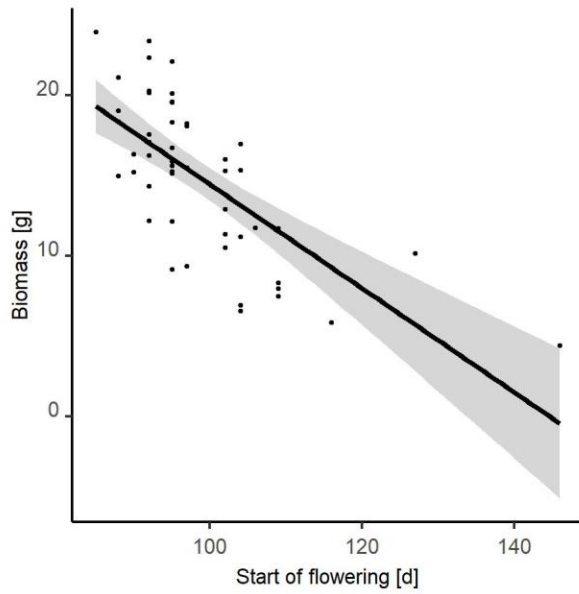

**Fig. S1.** The relationship between flowering time and biomass in *Lychnis floss-cuculi*, as estimated from a linear model. The relationship is significant at  $P < 0.01$ .

**Table S1.** Results of statistical models testing for changes of mean and of coefficient of variation in biomass, height, number of flowers and start of flowering across cultivated generations (see Figure 2 in the main text). P-values < 0.05 are in bold.

| Parameter              | Mode      | Estimate | Std.Error | P            | Conditional R <sup>2</sup> | NumDf | DenDf | F     |
|------------------------|-----------|----------|-----------|--------------|----------------------------|-------|-------|-------|
| Biomass [g]            | Mean      | 0.07     | 0.021     | <b>0.001</b> | 0.007                      | 1559  | 10.55 | 16.29 |
| Height [cm]            | Mean      | 0.052    | 0.021     | <b>0.015</b> | 0.004                      | 1587  | 5.92  | 5.92  |
| Number of flowers      | Mean      | 0.064    | 0.027     | <b>0.019</b> | 0.006                      | 918   | 5.55  | 5.55  |
| Start of flowering [d] | Mean      | -0.049   | 0.027     | 0.069        | 0.003                      | 948   | 3.31  | 3.31  |
| Biomass [g]            | Variation | -0.015   | 0.007     | <b>0.029</b> | 0.392                      | 72.89 | 4.93  | 4.93  |
| Height [cm]            | Variation | 0.023    | 0.012     | 0.065        | 0.733                      | 67.08 | 3.52  | 3.52  |
| Number of flowers      | Variation | -0.044   | 0.017     | <b>0.010</b> | 0.412                      | 50.57 | 7.12  | 7.12  |
| Start of flowering [d] | Variation | -0.007   | 0.003     | <b>0.010</b> | 0.531                      | 40.12 | 7.40  | 7.40  |

**Table S2.** Results of models testing for changes in biomass, height, number of flowers and seed shattering within individual cultivation lineages. The “data range [F0]” was calculated as four-times standard deviation of the respective parameter in the F0. The last column shows the change per generation expressed as % of the data range among the plants from the wild collection (F0). Seed shattering is expressed as the odds of number of flowers that still had seeds at the end of harvest versus flowers that lost the seeds. P-values  $\leq 0.05$  are in bold.

| Species                        | Producer | Region | Trait       | Estimate | Std.Error | P                | R <sup>2</sup> | NumDf | DenDf | F      | Data range [F0] | % Effect size/Data range |
|--------------------------------|----------|--------|-------------|----------|-----------|------------------|----------------|-------|-------|--------|-----------------|--------------------------|
| <i>Achillea millefolium</i>    | P2       |        | Biomass [g] | 0.335    | 0.394     | 0.399            | 0.014          | 1     | 51    | 0.723  | 16.288          | 2.059                    |
| <i>Anthoxanthum odoratum</i>   | P2       |        | Biomass [g] | 0.222    | 0.730     | 0.763            | 0.002          | 1     | 52    | 0.092  | 14.518          | 1.527                    |
| <i>Centaurea scabiosa</i>      | P2       |        | Biomass [g] | 0.243    | 0.419     | 0.564            | 0.005          | 1     | 66    | 0.336  | 14.786          | 1.644                    |
| <i>Crepis biennis</i>          | P2       |        | Biomass [g] | -0.866   | 0.983     | 0.385            | 0.023          | 1     | 33    | 0.775  | 24.410          | 3.546                    |
| <i>Cynosurus cristatus</i>     | P2       |        | Biomass [g] | 0.862    | 0.499     | 0.090            | 0.054          | 1     | 52    | 2.984  | 11.446          | 7.528                    |
| <i>Dianthus carthusianorum</i> | P2       |        | Biomass [g] | 0.634    | 0.298     | <b>0.036</b>     | 0.054          | 1     | 80    | 4.538  | 16.366          | 3.876                    |
| <i>Galium verum</i>            | P2       |        | Biomass [g] | -0.557   | 0.449     | 0.220            | 0.029          | 1     | 52    | 1.541  | 9.121           | 6.106                    |
| <i>Leucanthemum ircutianum</i> | P2       |        | Biomass [g] | -0.286   | 0.348     | 0.414            | 0.010          | 1     | 70    | 0.675  | 23.244          | 1.231                    |
| <i>Lotus corniculatus</i>      | P2       |        | Biomass [g] | 5.339    | 5.391     | 0.330            | 0.032          | 1     | 30    | 0.980  | 63.957          | 8.347                    |
| <i>Lychnis flos-cuculi</i>     | P2       |        | Biomass [g] | 3.494    | 0.697     | <b>&lt;0.001</b> | 0.339          | 1     | 49    | 25.119 | 16.669          | 20.960                   |
| <i>Salvia pratensis</i>        | P2       |        | Biomass [g] | -0.082   | 0.370     | 0.826            | 0.001          | 1     | 41    | 0.049  | 7.219           | 1.135                    |
| <i>Silene vulgaris</i>         | P2       |        | Biomass [g] | -0.023   | 0.454     | 0.959            | 0.000          | 1     | 69    | 0.003  | 12.588          | 0.185                    |
| <i>Veronica teucrium</i>       | P2       |        | Biomass [g] | 0.745    | 0.439     | 0.096            | 0.055          | 1     | 50    | 2.885  | 7.843           | 9.499                    |
| <i>Trifolium pratense</i>      | P1       |        | Biomass [g] | 0.018    | 0.324     | 0.955            | 0.000          | 1     | 70    | 0.003  | 12.332          | 0.150                    |
| <i>Centaurea jacea</i>         | P1       |        | Biomass [g] | 1.571    | 0.721     | <b>0.033</b>     | 0.065          | 1     | 68    | 4.755  | 33.055          | 4.754                    |
| <i>Lotus corniculatus</i>      | P1       |        | Biomass [g] | 4.065    | 1.624     | <b>0.015</b>     | 0.086          | 1     | 67    | 6.264  | 49.873          | 8.150                    |
| <i>Silene dioica</i>           | P1       |        | Biomass [g] | 1.013    | 0.718     | 0.164            | 0.031          | 1     | 62    | 1.987  | 22.080          | 4.586                    |
| <i>Silene vulgaris</i>         | P1       |        | Biomass [g] | 0.023    | 0.423     | 0.956            | 0.000          | 1     | 69    | 0.003  | 20.599          | 0.114                    |
| <i>Achillea millefolium</i>    | P1       |        | Biomass [g] | 1.082    | 0.892     | 0.231            | 0.028          | 1     | 51    | 1.472  | 19.486          | 5.551                    |
| <i>Crepis biennis</i>          | P1       |        | Biomass [g] | 1.358    | 0.554     | <b>0.017</b>     | 0.081          | 1     | 68    | 6.014  | 13.550          | 10.023                   |
| <i>Rumex acetosa</i>           | P1       | R6     | Biomass [g] | -0.266   | 1.041     | 0.799            | 0.001          | 1     | 51    | 0.065  | 24.810          | 1.073                    |
| <i>Leucanthemum ircutianum</i> | P1       |        | Biomass [g] | 0.349    | 0.489     | 0.478            | 0.007          | 1     | 69    | 0.509  | 23.575          | 1.479                    |

| Species                        | Producer | Region | Trait       | Estimate | Std.Error | P                | R <sup>2</sup> | NumDf | DenDf | F      | Data range [F0] | % Effect size/Data range |
|--------------------------------|----------|--------|-------------|----------|-----------|------------------|----------------|-------|-------|--------|-----------------|--------------------------|
| <i>Ranunculus acris</i>        | P1       |        | Biomass [g] | -0.677   | 0.301     | <b>0.027</b>     | 0.068          | 1     | 70    | 5.072  | 13.744          | 4.925                    |
| <i>Rumex acetosa</i>           | P1       | R16    | Biomass [g] | 0.175    | 0.550     | 0.751            | 0.002          | 1     | 51    | 0.101  | 10.892          | 1.609                    |
| <i>Centaurea scabiosa</i>      | P1       |        | Biomass [g] | -0.593   | 1.147     | 0.608            | 0.007          | 1     | 39    | 0.268  | 22.073          | 2.688                    |
| <i>Leontodon hispidus</i>      | P1       |        | Biomass [g] | 1.430    | 0.487     | <b>0.005</b>     | 0.142          | 1     | 52    | 8.622  | 13.117          | 10.902                   |
| <i>Leontodon hispidus</i>      | P2       |        | Biomass [g] | -0.197   | 0.568     | 0.730            | 0.002          | 1     | 51    | 0.120  | 11.902          | 1.657                    |
| <i>Achillea millefolium</i>    | P2       |        | Height [cm] | -0.143   | 0.396     | 0.719            | 0.003          | 1     | 52    | 0.131  | 17.368          | 0.824                    |
| <i>Anthoxanthum odoratum</i>   | P2       |        | Height [cm] | 1.111    | 0.663     | 0.100            | 0.051          | 1     | 52    | 2.810  | 17.476          | 6.358                    |
| <i>Centaurea scabiosa</i>      | P2       |        | Height [cm] | 1.912    | 1.154     | 0.102            | 0.041          | 1     | 65    | 2.746  | 24.514          | 7.800                    |
| <i>Crepis biennis</i>          | P2       |        | Height [cm] | 3.052    | 1.441     | <b>0.039</b>     | 0.081          | 1     | 51    | 4.483  | 15.954          | 19.128                   |
| <i>Cynosurus cristatus</i>     | P2       |        | Height [cm] | 0.972    | 0.589     | 0.105            | 0.050          | 1     | 52    | 2.725  | 13.088          | 7.428                    |
| <i>Dianthus carthusianorum</i> | P2       |        | Height [cm] | 0.322    | 0.587     | 0.585            | 0.004          | 1     | 80    | 0.301  | 24.162          | 1.332                    |
| <i>Galium verum</i>            | P2       |        | Height [cm] | 0.326    | 0.966     | 0.737            | 0.002          | 1     | 51    | 0.114  | 19.229          | 1.697                    |
| <i>Leucanthemum ircutianum</i> | P2       |        | Height [cm] | 0.325    | 0.177     | 0.070            | 0.046          | 1     | 70    | 3.381  | 11.606          | 2.804                    |
| <i>Lotus corniculatus</i>      | P2       |        | Height [cm] | 7.433    | 1.456     | <b>&lt;0.001</b> | 0.457          | 1     | 31    | 26.053 | 13.213          | 56.257                   |
| <i>Lychnis flos-cuculi</i>     | P2       |        | Height [cm] | 0.899    | 0.702     | 0.206            | 0.031          | 1     | 52    | 1.640  | 18.187          | 4.945                    |
| <i>Salvia pratensis</i>        | P2       |        | Height [cm] | -2.697   | 1.850     | 0.153            | 0.049          | 1     | 41    | 2.125  | 21.831          | 12.355                   |
| <i>Silene vulgaris</i>         | P2       |        | Height [cm] | 0.056    | 0.762     | 0.942            | 0.000          | 1     | 70    | 0.005  | 29.452          | 0.189                    |
| <i>Veronica teucrium</i>       | P2       |        | Height [cm] | 0.389    | 0.613     | 0.529            | 0.008          | 1     | 50    | 0.402  | 11.052          | 3.519                    |
| <i>Trifolium pratense</i>      | P1       |        | Height [cm] | 0.178    | 1.214     | 0.884            | 0.000          | 1     | 69    | 0.022  | 41.037          | 0.435                    |
| <i>Centaurea jacea</i>         | P1       |        | Height [cm] | 1.936    | 1.089     | 0.080            | 0.044          | 1     | 69    | 3.164  | 44.405          | 4.361                    |
| <i>Lotus corniculatus</i>      | P1       |        | Height [cm] | 1.222    | 0.538     | <b>0.026</b>     | 0.071          | 1     | 67    | 5.150  | 14.829          | 8.239                    |
| <i>Silene dioica</i>           | P1       |        | Height [cm] | 1.606    | 1.286     | 0.217            | 0.025          | 1     | 62    | 1.559  | 42.895          | 3.743                    |
| <i>Silene vulgaris</i>         | P1       |        | Height [cm] | -0.733   | 0.728     | 0.317            | 0.014          | 1     | 70    | 1.015  | 30.539          | 2.401                    |
| <i>Achillea millefolium</i>    | P1       |        | Height [cm] | -0.139   | 0.623     | 0.825            | 0.001          | 1     | 52    | 0.050  | 13.917          | 0.998                    |
| <i>Crepis biennis</i>          | P1       |        | Height [cm] | 0.228    | 0.373     | 0.543            | 0.005          | 1     | 70    | 0.373  | 12.333          | 1.847                    |
| <i>Rumex acetosa</i>           | P1       | R6     | Height [cm] | 0.083    | 0.925     | 0.929            | 0.000          | 1     | 52    | 0.008  | 24.462          | 0.341                    |

| Species                        | Producer | Region | Trait                  | Estimate | Std.Error | P                | R <sup>2</sup> | NumDf | DenDf | F      | Data range [F0] | % Effect size/Data range |
|--------------------------------|----------|--------|------------------------|----------|-----------|------------------|----------------|-------|-------|--------|-----------------|--------------------------|
| <i>Leucanthemum ircutianum</i> | P1       |        | Height [cm]            | -0.320   | 0.304     | 0.295            | 0.016          | 1     | 69    | 1.111  | 11.355          | 2.818                    |
| <i>Ranunculus acris</i>        | P1       |        | Height [cm]            | -0.206   | 0.736     | 0.781            | 0.001          | 1     | 70    | 0.078  | 25.940          | 0.792                    |
| <i>Rumex acetosa</i>           | P1       | R16    | Height [cm]            | -0.611   | 0.772     | 0.432            | 0.012          | 1     | 52    | 0.627  | 19.084          | 3.202                    |
| <i>Centaurea scabiosa</i>      | P1       |        | Height [cm]            | -6.097   | 5.067     | 0.236            | 0.036          | 1     | 39    | 1.448  | 119.952         | 5.083                    |
| <i>Leontodon hispidus</i>      | P1       |        | Height [cm]            | 0.278    | 1.231     | 0.822            | 0.001          | 1     | 52    | 0.051  | 40.613          | 0.684                    |
| <i>Leontodon hispidus</i>      | P2       |        | Height [cm]            | 0.611    | 1.118     | 0.587            | 0.006          | 1     | 51    | 0.299  | 27.585          | 2.215                    |
| <i>Achillea millefolium</i>    | P2       |        | Number of flowers      | 33.408   | 16.877    | 0.058            | 0.123          | 1     | 28    | 3.918  | 292.366         | 11.427                   |
| <i>Dianthus carthusianorum</i> | P2       |        | Number of flowers      | 4.001    | 4.222     | 0.346            | 0.011          | 1     | 79    | 0.898  | 282.422         | 1.417                    |
| <i>Lotus corniculatus</i>      | P2       |        | Number of flowers      | 149.656  | 86.758    | 0.094            | 0.088          | 1     | 31    | 2.976  | 903.324         | 16.567                   |
| <i>Lychnis flos-cuculi</i>     | P2       |        | Number of flowers      | 60.407   | 16.783    | <b>0.001</b>     | 0.216          | 1     | 47    | 12.955 | 362.413         | 16.668                   |
| <i>Silene vulgaris</i>         | P2       |        | Number of flowers      | -24.639  | 9.055     | <b>0.008</b>     | 0.096          | 1     | 70    | 7.404  | 294.509         | 8.366                    |
| <i>Trifolium pratense</i>      | P1       |        | Number of flowers      | 1.265    | 1.527     | 0.412            | 0.015          | 1     | 44    | 0.686  | 42.748          | 2.958                    |
| <i>Centaurea jacea</i>         | P1       |        | Number of flowers      | 1.501    | 1.241     | 0.230            | 0.021          | 1     | 69    | 1.464  | 65.313          | 2.298                    |
| <i>Lotus corniculatus</i>      | P1       |        | Number of flowers      | 70.114   | 24.904    | <b>0.006</b>     | 0.106          | 1     | 67    | 7.926  | 512.341         | 13.685                   |
| <i>Silene dioica</i>           | P1       |        | Number of flowers      | 5.987    | 17.071    | 0.727            | 0.002          | 1     | 62    | 0.123  | 662.398         | 0.904                    |
| <i>Silene vulgaris</i>         | P1       |        | Number of flowers      | 1.622    | 7.896     | 0.838            | 0.001          | 1     | 70    | 0.042  | 378.739         | 0.428                    |
| <i>Achillea millefolium</i>    | P1       |        | Number of flowers      | -5.588   | 36.155    | 0.878            | 0.001          | 1     | 42    | 0.024  | 749.722         | 0.745                    |
| <i>Leucanthemum ircutianum</i> | P1       |        | Number of flowers      | -0.589   | 0.969     | 0.545            | 0.006          | 1     | 58    | 0.370  | 33.398          | 1.764                    |
| <i>Ranunculus acris</i>        | P1       |        | Number of flowers      | -0.811   | 4.150     | 0.846            | 0.001          | 1     | 70    | 0.038  | 192.151         | 0.422                    |
| <i>Leontodon hispidus</i>      | P1       |        | Number of flowers      | 7.278    | 1.652     | <b>&lt;0.001</b> | 0.272          | 1     | 52    | 19.409 | 40.828          | 17.825                   |
| <i>Leontodon hispidus</i>      | P2       |        | Number of flowers      | -0.667   | 1.597     | 0.678            | 0.003          | 1     | 51    | 0.174  | 31.820          | 2.095                    |
| <i>Achillea millefolium</i>    | P2       |        | Start of flowering [d] | -1.070   | 0.734     | 0.156            | 0.071          | 1     | 28    | 2.124  | 40.100          | 2.668                    |
| <i>Dianthus carthusianorum</i> | P2       |        | Start of flowering [d] | -0.303   | 0.652     | 0.643            | 0.003          | 1     | 79    | 0.216  | 49.440          | 0.613                    |
| <i>Lotus corniculatus</i>      | P2       |        | Start of flowering [d] | 0.022    | 3.092     | 0.994            | 0.000          | 1     | 31    | 0.000  | 38.779          | 0.057                    |
| <i>Lychnis flos-cuculi</i>     | P2       |        | Start of flowering [d] | -6.918   | 1.556     | <b>&lt;0.001</b> | 0.292          | 1     | 48    | 19.755 | 53.342          | 12.969                   |
| <i>Silene vulgaris</i>         | P2       |        | Start of flowering [d] | 0.833    | 0.579     | 0.154            | 0.029          | 1     | 70    | 2.074  | 22.512          | 3.702                    |

| Species                        | Producer | Region | Trait                  | Estimate | Std.Error | P                | R <sup>2</sup> | NumDf | DenDf | F      | Data range [F0] | % Effect size/Data range |
|--------------------------------|----------|--------|------------------------|----------|-----------|------------------|----------------|-------|-------|--------|-----------------|--------------------------|
| <i>Trifolium pratense</i>      | P1       |        | Start of flowering [d] | 0.539    | 1.070     | 0.616            | 0.004          | 1     | 69    | 0.254  | 40.357          | 1.335                    |
| <i>Centaurea jacea</i>         | P1       |        | Start of flowering [d] | -0.352   | 0.545     | 0.520            | 0.006          | 1     | 68    | 0.418  | 21.866          | 1.610                    |
| <i>Lotus corniculatus</i>      | P1       |        | Start of flowering [d] | 0.537    | 0.589     | 0.365            | 0.012          | 1     | 67    | 0.832  | 18.280          | 2.939                    |
| <i>Silene dioica</i>           | P1       |        | Start of flowering [d] | -0.483   | 1.012     | 0.635            | 0.004          | 1     | 62    | 0.228  | 46.016          | 1.050                    |
| <i>Silene vulgaris</i>         | P1       |        | Start of flowering [d] | -0.333   | 0.504     | 0.511            | 0.006          | 1     | 70    | 0.437  | 15.591          | 2.138                    |
| <i>Achillea millefolium</i>    | P1       |        | Start of flowering [d] | 2.020    | 1.175     | 0.093            | 0.066          | 1     | 42    | 2.956  | 21.085          | 9.582                    |
| <i>Leucanthemum ircutianum</i> | P1       |        | Start of flowering [d] | -3.282   | 0.788     | <b>&lt;0.001</b> | 0.227          | 1     | 59    | 17.367 | 27.087          | 12.117                   |
| <i>Ranunculus acris</i>        | P1       |        | Start of flowering [d] | -0.117   | 0.918     | 0.899            | 0.000          | 1     | 70    | 0.016  | 41.637          | 0.280                    |
| <i>Leontodon hispidus</i>      | P1       |        | Start of flowering [d] | -3.306   | 1.820     | 0.075            | 0.060          | 1     | 52    | 3.298  | 37.835          | 8.737                    |
| <i>Leontodon hispidus</i>      | P2       |        | Start of flowering [d] | 0.667    | 1.184     | 0.576            | 0.006          | 1     | 52    | 0.317  | 22.702          | 2.937                    |
| <i>Lotus corniculatus</i>      | P2       |        | Seed shattering        | 0.972    | 1.323     | 0.920            | NA             | 1     | 33    | 0.01   | 7.686           | 12.649                   |
| <i>Silene vulgaris</i>         | P2       |        | Seed shattering        | 1.091    | 1.063     | 0.162            | NA             | 1     | 70    | 2      | 1.302           | 83.789                   |
| <i>Centaurea jacea</i>         | P1       |        | Seed shattering        | 1.363    | 1.141     | <b>&lt;0.001</b> | NA             | 1     | 68    | 5.630  | 3.072           | 44.375                   |
| <i>Lotus corniculatus</i>      | P1       |        | Seed shattering        | 0.939    | 1.102     | 0.520            | NA             | 1     | 67    | 0.418  | 2.907           | 32.313                   |
| <i>Silene vulgaris</i>         | P1       |        | Seed shattering        | 0.924    | 1.076     | 0.287            | NA             | 1     | 70    | 1.152  | 10.768          | 8.584                    |
